# Supplementary material for: Associations among Physical Activity, Diet, and Obesity Measures Change during Adolescence
Source: Hindawi journal article supplement (doi:10.1155/2015/805065), 2015-01-01
Supplement: f1 [file 805065.f1.pdf]

Supplemental Tables for Reviewers Only

TABLE S1. Bivariate results; Spearman's rho correlation for income, race, habitual physical activity questionnaire score (HAQ), 3 day activity diary score (3d AD), average energy density (ED), average caloric intake (Av kcal), average dietary saturated fat percent (Sat fat %), average fiber intake (fiber) by visit year

|         | Year | Income | Race    | HAQ     | 3d AD   | ED      | Av kcal | Satfat% | Fiber   | BMI     | BF%     |
|---------|------|--------|---------|---------|---------|---------|---------|---------|---------|---------|---------|
| Income  | 3    | 1      | -.348** | .069**  | -.056   | -.176** | -.007   | -.090** | .057    | -.114** | -.034   |
|         | 5    | 1      | -.358** | .122**  | .036    | -.164** | -.010   | -.175** | .128**  | -.147** | -.079** |
|         | 7    | 1      | -.354** | .301**  | .012    | -.185** | -.053   | -.156** | .132**  | -.144** | -.135** |
|         | 8    | 1      | -.348** | .289**  | -.028   | -.154** | -.074** | -.211** | .138**  | -.149** | -.114** |
|         | 10   | 1      | -.357** | .317**  | -.067** | -.207** | -.083** | -.238** | .144**  | -.172** | -.163** |
| Race    | 3    |        | 1       | -.090** | -.088** | .208**  | .088**  | .020    | -.022   | .188**  | .087**  |
|         | 5    |        | 1       | -.193** | -.104** | .250**  | .099**  | .079**  | -.064** | .185**  | .094**  |
|         | 7    |        | 1       | -.346** | -.164** | .300**  | .133**  | .120**  | -.121** | .200**  | .121**  |
|         | 8    |        | 1       | -.291** | -.075** | .276**  | .103**  | .142**  | -.115** | .207**  | .108**  |
|         | 10   |        | 1       | -.348** | -.013   | .373**  | .111**  | .206**  | -.119** | .207**  | .162**  |
| HAQ     | 3    |        |         | 1       | .263**  | -.038   | .017    | -.013   | .042    | -.060** | -.086** |
|         | 5    |        |         | 1       | .285**  | -.095** | .020    | -.045   | .075**  | -.090** | -.120** |
|         | 7    |        |         | 1       | .249**  | -.153** | .007    | -.138** | .199**  | -.141** | -.152** |
|         | 8    |        |         | 1       | .220**  | -.129** | -.014   | -.192** | .156**  | -.128** | -.155** |
|         | 10   |        |         | 1       | .103**  | -.172** | -.066** | -.212** | .202**  | -.144** | -.159** |
| AD      | 3    |        |         |         | 1       | .004    | .056    | .004    | .064**  | .003    | -.085** |
|         | 5    |        |         |         | 1       | -.001   | .082**  | .062**  | .075**  | -.028   | -.081** |
|         | 7    |        |         |         | 1       | -.049   | .086**  | -.017   | .127**  | .003    | -.005   |
|         | 8    |        |         |         | 1       | -.011   | .096**  | -.020   | .136**  | .052    | .031    |
|         | 10   |        |         |         | 1       | -.071** | .050    | -.047   | .048    | .078**  | .062**  |
| ED      | 3    |        |         |         |         | 1       | .249**  | .342**  | .064**  | -.029   | -.077** |
|         | 5    |        |         |         |         | 1       | .291**  | .382**  | .094**  | -.056   | -.084** |
|         | 7    |        |         |         |         | 1       | .290**  | .449**  | .060    | -.035   | -.031   |
|         | 8    |        |         |         |         | 1       | .261**  | .481**  | .074**  | -.053   | -.045   |
|         | 10   |        |         |         |         | 1       | .238**  | .458**  | .037    | -.024   | .001    |
| Kcal    | 3    |        |         |         |         |         | 1       | .102**  | .678**  | -.046   | -.097** |
|         | 5    |        |         |         |         |         | 1       | .195**  | .664**  | -.127** | -.148** |
|         | 7    |        |         |         |         |         | 1       | .209**  | .627**  | -.069** | -.089** |
|         | 8    |        |         |         |         |         | 1       | .231**  | .620**  | -.066** | -.082** |
|         | 10   |        |         |         |         |         | 1       | .221**  | .575**  | -.028   | -.049   |
| Satfat% | 3    |        |         |         |         |         |         | 1       | -.154** | .046    | -.010   |
|         | 5    |        |         |         |         |         |         | 1       | -.068** | .025    | .017    |
|         | 7    |        |         |         |         |         |         | 1       | -.114** | -.040   | -.034   |

|       |    |  |  |  |  |  |  |   |         |         |         |
|-------|----|--|--|--|--|--|--|---|---------|---------|---------|
|       | 8  |  |  |  |  |  |  | 1 | -.093** | -.019   | .000    |
|       | 10 |  |  |  |  |  |  | 1 | -.151** | .008    | .016    |
| Fiber | 3  |  |  |  |  |  |  |   | 1       | -.092** | -.123** |
|       | 5  |  |  |  |  |  |  |   | 1       | -.113** | -.118** |
|       | 7  |  |  |  |  |  |  |   | 1       | -.102** | -.117** |
|       | 8  |  |  |  |  |  |  |   | 1       | -.089** | -.076** |
|       | 10 |  |  |  |  |  |  |   | 1       | -.088** | -.095** |
| BMI   | 3  |  |  |  |  |  |  |   |         | 1       | .835**  |
|       | 5  |  |  |  |  |  |  |   |         | 1       | .853**  |
|       | 7  |  |  |  |  |  |  |   |         | 1       | .864**  |
|       | 8  |  |  |  |  |  |  |   |         | 1       | .873**  |
|       | 10 |  |  |  |  |  |  |   |         | 1       | .900**  |

\*\* significance at  $P < 0.001$ ; two-tailed t test

TABLE S2. Percent variance (% var.) explained by first indices and first indices' canonical correlation (CC). Standardized canonical coefficients for physical activity and confounders [income category (Inc), race, maturation stage (MS), height (Ht), weight (Wt), race by HAQ (RxHAQ), race by 3 day AD (Rx3d AD), habitual physical activity questionnaire score (HAQ), 3 day activity diary score (3d AD)], and diet quality indicators [average energy density (ED), average caloric intake (Av kcal), average dietary saturated fat percent (Sat fat %), average fiber intake (fiber)] by visit year (y).

| y  | n    | % var. | CC   | Physical Activity, Confounders |         |        |         |       |           |            |         |        | Diet Quality |             |              |       |
|----|------|--------|------|--------------------------------|---------|--------|---------|-------|-----------|------------|---------|--------|--------------|-------------|--------------|-------|
|    |      |        |      | Inc                            | Race    | MS     | Ht      | Wt    | Rx<br>HAQ | Rx3d<br>AD | HAQ     | 3d AD  | ED           | Av<br>kcal. | Sat fat<br>% | fiber |
| 3  | 1701 | 66.26  | 0.29 | 0.32**                         | -0.64** | 0.32   | -0.30*  | 0.29† | 0.14*     | -0.66**    | -0.03†  | 0.45*  | -0.88        | -0.55       | 0.35         | 0.23  |
| 5  | 1576 | 66.19  | 0.34 | 0.41**                         | -0.67** | 0.02*  | -0.18*  | 0.38  | 0.35*     | -0.54**    | -0.09** | 0.27** | -0.67        | -0.79       | 0.10         | 0.76  |
| 7  | 1457 | 69.97  | 0.42 | 0.27**                         | -0.59** | -0.02* | -0.06*  | 0.10* | -.10**    | -0.46**    | 0.37**  | 0.30** | -0.57        | -0.89       | -0.15        | 0.91  |
| 8  | 1423 | 70.60  | 0.41 | 0.36**                         | -0.41** | -0.00  | -0.04** | 0.16  | -0.56**   | -0.31**    | 0.89**  | 0.29** | -0.54        | -0.65       | -0.08        | 0.86  |
| 10 | 1699 | 74.26  | 0.46 | 0.36**                         | -0.48** | n/a    | -0.08*  | 0.16* | -0.33**   | -0.17**    | 0.72**  | 0.25** | -0.60        | -0.49       | -0.17        | 0.65  |

† significance at  $P < 0.1$ ; \* significance at  $P < 0.05$ ; \*\* significance at  $P < 0.001$ ; for dependant variates significance is evaluated with a univariate F test for association with first indices canonical correlation.

TABLE S3. Cohort stratified by race (black). Percent variance (% var) explained by first indices and first indices' canonical correlation (CC). Standardized canonical coefficients for physical activity and confounders [income category (Inc), maturation stage (MS), height (Ht), weight (Wt), habitual physical activity questionnaire score (HAQ), 3 day activity diary score (3d AD)], and diet quality indicators [average energy density (ED), caloric intake (Av kcal), average dietary saturated fat percent (Sat fat %), average fiber intake (fiber)] by visit year (y).

| y  | n   | % var. | CC   | Physical Activity, Confounders |       |        |       |       |         | Diet Quality |         |          |       |
|----|-----|--------|------|--------------------------------|-------|--------|-------|-------|---------|--------------|---------|----------|-------|
|    |     |        |      | Inc                            | MS    | Ht     | Wt    | HAQ   | 3d AD   | ED           | Av kcal | Sat fat% | fiber |
| 3  | 870 | 67.24  | 0.22 | 0.23*                          | 0.48  | -0.50  | 0.40  | 0.00  | -0.70** | -0.43        | -0.39   | 0.11     | -0.53 |
| 5  | 815 | 70.17  | 0.29 | 0.72**                         | -0.02 | -0.21  | 0.49* | 0.37* | -0.47** | -0.37        | -0.91   | -0.26    | 0.80  |
| 7  | 741 | 52.78  | 0.24 | 0.38*                          | 0.01† | -0.25* | 0.44* | 0.21* | -0.79** | -0.31        | -0.81   | -0.21    | 0.02  |
| 8  | 734 | 57.52  | 0.23 | 0.51**                         | 0.09  | -0.35† | 0.65† | -0.00 | -0.62** | -0.46        | -0.70   | -0.19    | -0.00 |
| 10 | 861 | 56.70  | 0.25 | 0.72**                         | n/a   | -0.11  | 0.49† | 0.19* | -0.41** | -0.12        | -0.72   | -0.58    | 0.19  |

† significance at  $P < 0.1$ ; \* significance at  $P < 0.05$ ; \*\* significance at  $P < 0.001$ ; for dependant variates significance is evaluated with a univariate F test for association with first indices canonical correlation.

TABLE S4. Cohort stratified by race (white). Percent variance (% var) explained by first indices and first indices' canonical correlation (CC). Standardized canonical coefficients for physical activity and confounders [income category (Inc), maturation stage (MS), height (Ht), weight (Wt), habitual physical activity questionnaire score (HAQ), 3 day activity diary score (3d AD)], and diet quality indicators [average energy density (ED), caloric intake (Av kcal), average dietary saturated fat percent (Sat fat %), average fiber intake (fiber)] by visit year (y).

| y  | n   | % var. | CC   | Physical Activity, Confounders |        |         |        |        |        | Diet Quality |         |          |       |
|----|-----|--------|------|--------------------------------|--------|---------|--------|--------|--------|--------------|---------|----------|-------|
|    |     |        |      | Inc                            | MS     | Ht      | Wt     | HAQ    | 3d AD  | ED           | Av kcal | Sat fat% | fiber |
| 3  | 831 | 48.80  | 0.17 | 0.86**                         | 0.17*  | 0.35*   | -0.10* | 0.14   | -0.10  | -0.79        | 0.33    | -0.30    | 0.15  |
| 5  | 761 | 62.86  | 0.27 | 0.71**                         | -0.39* | 0.37†   | -0.35* | -0.01† | -0.00* | 0.22         | 0.41    | -0.69    | 0.41  |
| 7  | 716 | 77.85  | 0.34 | 0.59**                         | -0.04  | 0.02†   | -0.01† | 0.69** | 0.02†  | 0.08         | -0.15   | -0.38    | 0.93  |
| 8  | 689 | 71.13  | 0.36 | 0.53**                         | 0.07   | 0.16**  | -0.09  | 0.65** | 0.12*  | 0.05         | -0.26   | -0.61    | 0.78  |
| 10 | 838 | 80.26  | 0.38 | 0.55**                         | n/a    | -0.01** | 0.05   | 0.73** | 0.06*  | -0.11        | -0.32   | -0.45    | 0.79  |

† significance at  $P < 0.1$ ; \* significance at  $P < 0.05$ ; \*\* significance at  $P < 0.001$ ; for dependant variates significance is evaluated with a univariate F test for association with first indices canonical correlation.

TABLE S5. Percent variance (% var.) explained by first indices and first indices' canonical correlation (CC). Standardized canonical coefficients for obesity correlates [income category (Inc), race, maturation stage (MS), height (Ht), weight (Wt), race by HAQ (RxHAQ), race by 3 day AD (Rx3d AD), habitual physical activity questionnaire score (HAQ), 3 day activity diary score (3d AD), average energy density (ED), average caloric intake (Av kcal), average dietary saturated fat percent (Sat fat %), average fiber intake (fiber)], and body composition [BMI, body fat percent (BF%)] by visit year (y).

| y  | n    | % var. | CC   | Obesity Correlates |         |         |         |         |         |         |       |         |           |         | Body Composition |      |
|----|------|--------|------|--------------------|---------|---------|---------|---------|---------|---------|-------|---------|-----------|---------|------------------|------|
|    |      |        |      | Inc                | Race    | MS      | Rx HAQ  | Rx3d AD | HAQ     | 3d AD   | ED    | Av kcal | Sat fat % | fiber   | BMI              | BF%  |
| 3  | 1693 | 81.43  | 0.39 | 0.21**             | -0.50** | -0.77** | 0.33**  | 0.11**  | -0.36** | -0.29** | 0.07* | 0.05*   | -0.21**   | -0.05** | -1.80            | 1.12 |
| 5  | 1557 | 75.28  | 0.35 | 0.38**             | -0.32** | -0.56** | 0.01**  | -0.45** | 0.06**  | 0.18**  | 0.16* | 0.30**  | -0.12*    | -0.26*  | -1.61            | 0.75 |
| 7  | 1412 | 62.65  | 0.27 | 0.32**             | -0.71** | -0.27** | 0.24**  | 0.14*   | -0.04** | -0.22   | 0.18  | -0.02*  | 0.28†     | 0.26**  | -1.19            | 0.22 |
| 8  | 1378 | 63.45  | 0.30 | 0.15**             | -0.67** | -0.11*  | 0.37**  | -0.64** | -0.19** | 0.18**  | 0.18  | 0.07*   | 0.17*     | 0.03*   | -1.73            | 0.90 |
| 10 | 1679 | 83.47  | 0.29 | 0.38**             | -0.68** | n/a     | -0.11** | 0.11**  | 0.42**  | -0.28*  | 0.32  | 0.14    | 0.08      | 0.06**  | -1.14            | 0.16 |

† significance at  $P < 0.1$ ; \* significance at  $P < 0.05$ ; \*\* significance at  $P < 0.001$ ; for dependant variates significance is evaluated with a univariate F test for association with first indices canonical correlation.

TABLE S6. Cohort stratified by race (black). Percent variance (% var) explained by first indices and first indices' canonical correlation (CC). Standardized canonical coefficients for obesity correlates [income category (Inc) maturation stage (MS), height (Ht), weight (Wt), habitual physical activity questionnaire score (HAQ), 3 day activity diary score (3d AD), average energy density (ED), average caloric intake (Av kcal), average dietary saturated fat percent (Sat fat %), average fiber intake (fiber)], and body composition [BMI, body fat percent (BF%)] by visit year (y).

| y  | n   | % var. | CC   | Obesity Correlates |         |        |        |        |         |           |        | Body Composition |       |
|----|-----|--------|------|--------------------|---------|--------|--------|--------|---------|-----------|--------|------------------|-------|
|    |     |        |      | Inc                | MS      | HAQ    | 3d AD  | ED     | Av kcal | Sat fat % | fiber  | BMI              | BF%   |
| 3  | 865 | 63.89  | 0.29 | 0.25**             | -0.92** | 0.02   | -0.24* | 0.07*  | 0.09*   | -0.31*    | -0.08† | -1.91            | 1.27  |
| 5  | 802 | 55.82  | 0.26 | 0.02**             | 0.66**  | -0.43* | 0.02** | -0.31* | -0.57*  | -0.05*    | 0.37   | -0.50            | 1.43  |
| 7  | 714 | 89.14  | 0.25 | 0.44*              | -0.45*  | 0.50*  | -0.10  | 0.09   | 0.17*   | 0.29†     | 0.32*  | 0.81             | -1.66 |
| 8  | 701 | 56.55  | 0.23 | 0.32*              | 0.05    | 0.70** | -0.26* | 0.30†  | 0.66*   | -0.34*    | -0.18† | 0.72             | -1.60 |
| 10 | 851 | 75.32  | 0.18 | 0.43*              | n/a     | 0.36*  | -0.31  | 0.53** | 0.35†   | 0.19†     | 0.12   | -0.70            | -0.32 |

† significance at  $P < 0.1$ ; \* significance at  $P < 0.05$ ; \*\* significance at  $P < 0.001$ ; for dependant variates significance is evaluated with a univariate F test for association with first indices canonical correlation.



TABLE S7. Cohort stratified by race (white). Percent variance (% var) explained by first indices and first indices' canonical correlation (CC). Standardized canonical coefficients for obesity correlates [income category (Inc) maturation stage (MS), height (Ht), weight (Wt), habitual physical activity questionnaire score (HAQ), 3 day activity diary score (3d AD), average energy density (ED), average caloric intake (Av kcal), average dietary saturated fat percent (Sat fat %), average fiber intake (fiber)], and body composition [BMI, body fat percent (BF%)] by visit year (y).

| y  | n   | % var. | CC   | Obesity Correlates |         |         |         |       |         |           | Body Composition |       |       |
|----|-----|--------|------|--------------------|---------|---------|---------|-------|---------|-----------|------------------|-------|-------|
|    |     |        |      | Inc                | MS      | HAQ     | 3d AD   | ED    | Av kcal | Sat fat % | fiber            | BMI   | BF%   |
| 3  | 828 | 81.76  | 0.39 | 0.22*              | -0.84** | -0.20** | -0.23** | 0.09  | 0.05    | -0.23*    | -0.09*           | -1.76 | 1.17  |
| 5  | 755 | 88.34  | 0.36 | 0.51**             | -0.70** | 0.12*   | -0.02*  | 0.28* | 0.13*   | -0.21     | -0.06*           | -1.14 | 0.17  |
| 7  | 698 | 66.57  | 0.24 | 0.57**             | -0.43*  | 0.40**  | -0.13   | 0.30* | 0.01    | 0.04*     | 0.22*            | -0.26 | -0.76 |
| 8  | 677 | 76.35  | 0.27 | 0.47**             | -0.40*  | 0.56**  | -0.29   | 0.30  | 0.17    | -0.15     | 0.10             | 0.11  | -1.10 |
| 10 | 828 | 80.54  | 0.26 | 0.70**             | n/a     | 0.56**  | -0.28   | 0.10* | 0.12    | 0.03      | 0.02*            | 0.51  | 0.52  |

† significance at  $P < 0.1$ ; \* significance at  $P < 0.05$ ; \*\* significance at  $P < 0.001$ ; for dependant variates significance is evaluated with a univariate F test for association with first indices canonical correlation
